# Supplementary figures and images for: Comparison of virus isolation using the Vero E6 cell line with real-time RT-PCR assay for the detection of human metapneumovirus
Source: Springer Nature journal article supplement (doi:10.1186/1471-2334-10-170), 2010-06-14

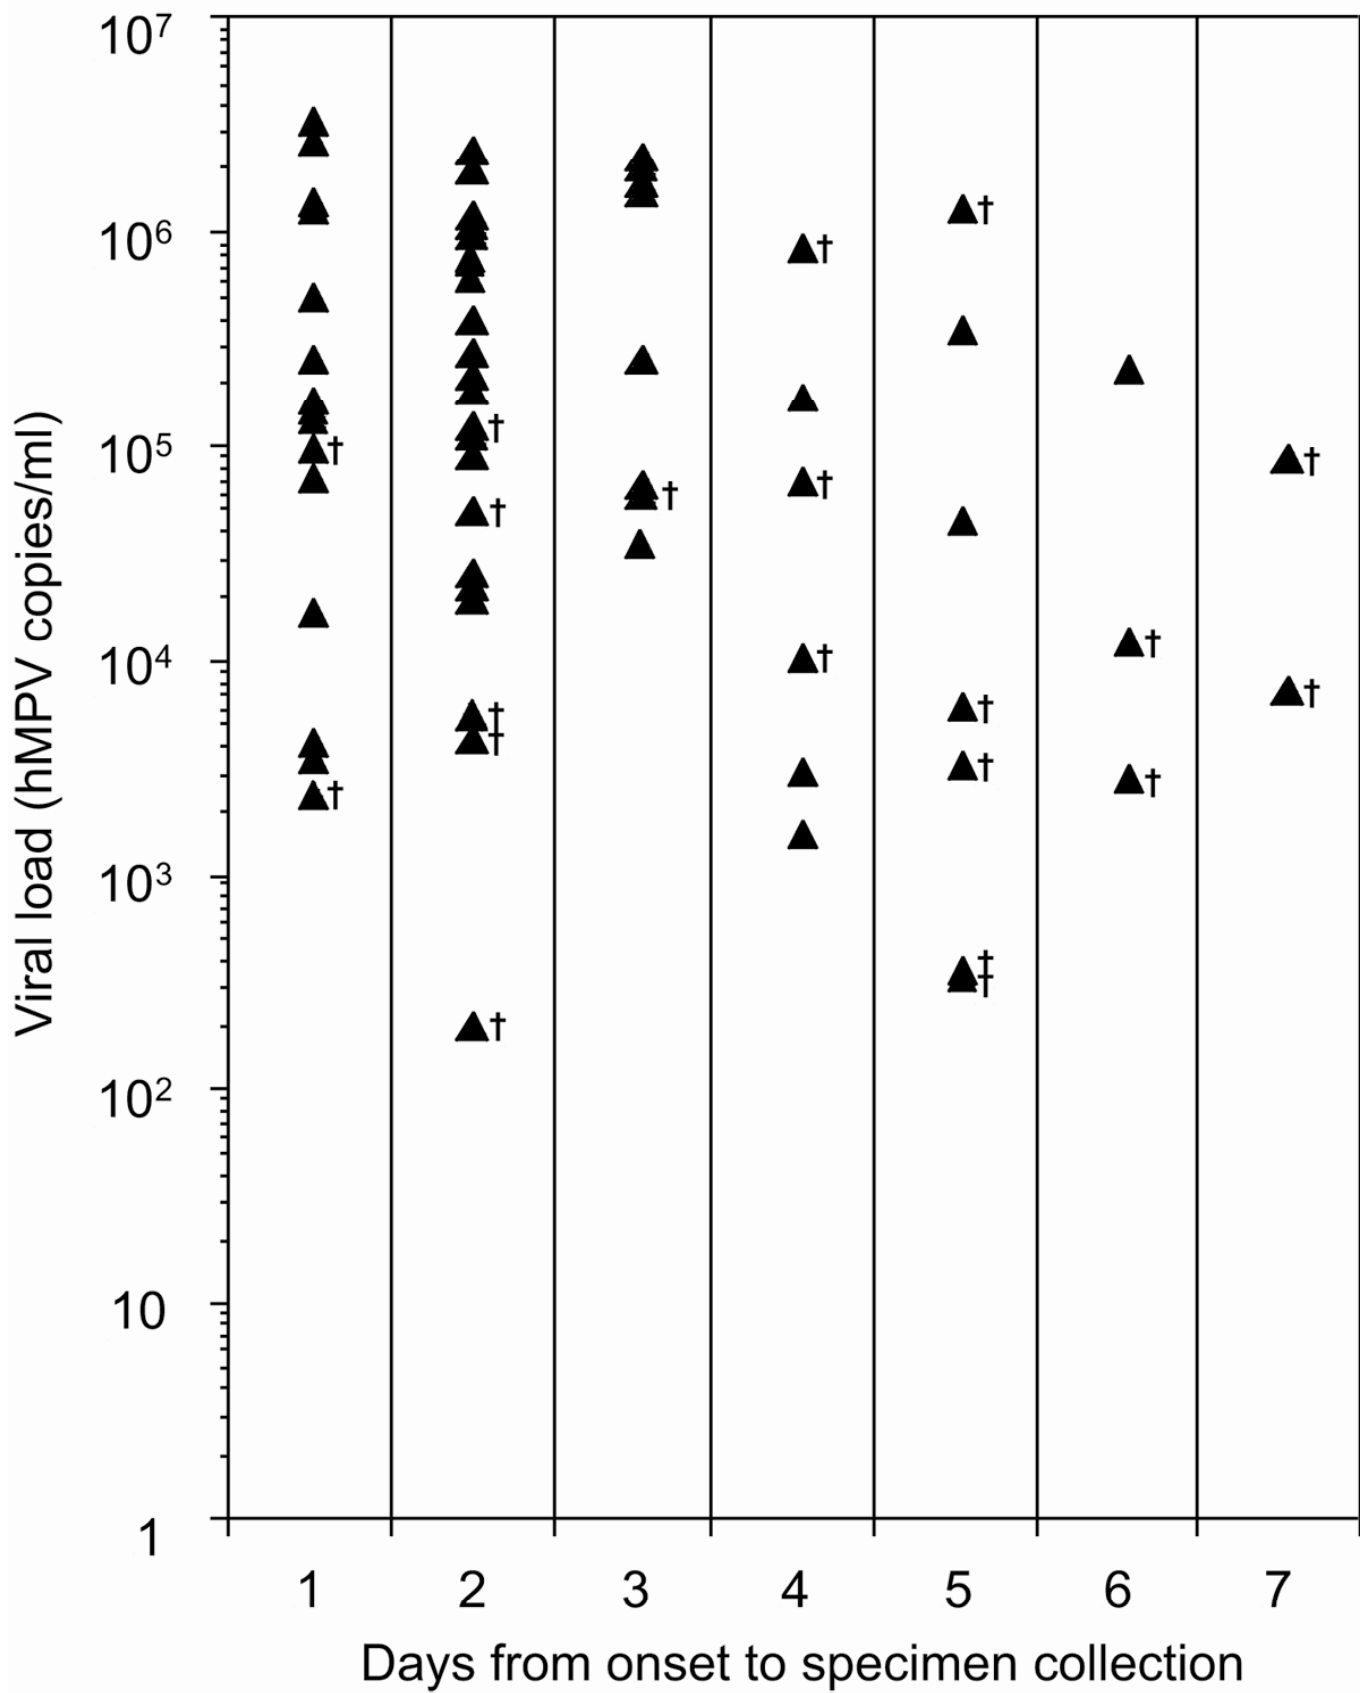

Supplement: 12879_2009_1150_MOESM1_ESM.pdf [file 12879_2009_1150_MOESM1_ESM.pdf]
